# Supplementary material for: Projecting the Global Distribution of the Emerging Amphibian Fungal Pathogen, Batrachochytrium dendrobatidis, Based on IPCC Climate Futures
Source: PubMed Central journal article supplement (PMC4981458; doi:10.1371/journal.pone.0160746), 2016-08-11
Supplement: pone.0160746.s002.pdf [file pone.0160746.s002.pdf]

**S1 Table. Input features in the random forest models and their definitions.** Values were extracted for each coordinate for each year during 2000–2010, then averaged over the period.

| <b>Variable name</b> | <b>Definition</b>                                            | <b>Units</b>       |
|----------------------|--------------------------------------------------------------|--------------------|
| <b>mean_temp</b>     | mean annual temperature                                      | °C                 |
| <b>high_mean</b>     | highest monthly average temperature in a year                | °C                 |
| <b>low_mean</b>      | lowest monthly average temperature in a year                 | °C                 |
| <b>mean_max</b>      | annual mean of mean monthly maximum daily temperature        | °C                 |
| <b>high_max</b>      | annual maximum of mean monthly maximum daily temperature     | °C                 |
| <b>low_max</b>       | annual minimum of mean monthly maximum daily temperature     | °C                 |
| <b>mean_min</b>      | annual mean of mean monthly minimum daily temperature        | °C                 |
| <b>high_min</b>      | annual maximum of mean monthly minimum daily temperature     | °C                 |
| <b>low_min</b>       | annual minimum of mean monthly minimum daily temperature     | °C                 |
| <b>t_range</b>       | high_max – low_min                                           | °C                 |
| <b>mean_pre</b>      | annual mean of monthly precipitation                         | mm                 |
| <b>high_pre</b>      | annual maximum of monthly precipitation                      | mm                 |
| <b>low_pre</b>       | annual minimum of monthly precipitation                      | mm                 |
| <b>elevation</b>     | the altitude of a site                                       | m                  |
| <b>eng_dec_in</b>    | whether the site has documented enigmatic amphibian declines | 0/1                |
| <b>sp_rich</b>       | estimated number of amphibian species at the site            | [number]           |
| <b>biome</b>         | biome designation at site                                    | [categorical type] |
