# Supplementary material for: Projecting the Global Distribution of the Emerging Amphibian Fungal Pathogen, Batrachochytrium dendrobatidis, Based on IPCC Climate Futures
Source: PubMed Central journal article supplement (PMC4981458; doi:10.1371/journal.pone.0160746), 2016-08-11
Supplement: pone.0160746.s003.pdf [file pone.0160746.s003.pdf]

**S2 Table. Regional samples sizes (sites per region) for the amphibian chytrid fungus (*Batrachochytrium dendrobatidis*, *Bd*), chytrid occurrence probabilities, and validation results based on random forest models trained on combined worldwide data. AUC = area under the receiver-operator curve.**

| <b>Region</b>          | <b>Sample size</b> |                                   | <b>Mean accuracy</b> | <b>AUC</b> |
|------------------------|--------------------|-----------------------------------|----------------------|------------|
|                        | <b>(no. sites)</b> | <b>% <i>Bd</i>-detected sites</b> |                      |            |
| <b>Africa</b>          | 333                | 0.3544                            | 0.9550               | 0.9886     |
| <b>Asia</b>            | 419                | 0.1718                            | 0.9761               | 0.9981     |
| <b>Australasia</b>     | 847                | 0.4451                            | 0.8737               | 0.9488     |
| <b>Caribbean</b>       | 28                 | 0.6429                            | 1.0000               | 1.0000     |
| <b>Central America</b> | 27                 | 0.6296                            | 0.9630               | 1.0000     |
| <b>Europe</b>          | 770                | 0.3039                            | 0.8623               | 0.9458     |
| <b>North America</b>   | 2333               | 0.4483                            | 0.8933               | 0.9635     |
| <b>South America</b>   | 210                | 0.5429                            | 0.9429               | 0.9938     |
