# Supplementary material for: Projecting the Global Distribution of the Emerging Amphibian Fungal Pathogen, Batrachochytrium dendrobatidis, Based on IPCC Climate Futures
Source: PubMed Central journal article supplement (PMC4981458; doi:10.1371/journal.pone.0160746), 2016-08-11
Supplement: pone.0160746.s004.pdf [file pone.0160746.s004.pdf]

**S3 Table. Mean accuracy and area under the receiver-operator curve (AUC) for each region based on separate random forest models trained on amphibian chytrid fungus (*Batrachochytrium dendrobatidis*) data from each region.**

| <b>Region</b>        | <b>Mean accuracy</b> | <b>Standard deviation</b> |            |                   |
|----------------------|----------------------|---------------------------|------------|-------------------|
|                      |                      | <b>(mean accuracy)</b>    | <b>AUC</b> | <b>s.d. (AUC)</b> |
| <b>Africa</b>        | 0.998126             | 0.001111                  | 0.976451   | 0.009383          |
| <b>Asia</b>          | 0.999541             | 0.000468                  | 0.983954   | 0.007389          |
| <b>Australasia</b>   | 0.99115              | 0.002234                  | 0.950904   | 0.008226          |
| <b>Europe</b>        | 0.997332             | 0.001014                  | 0.965998   | 0.006929          |
| <b>North America</b> | 0.977234             | 0.002675                  | 0.914089   | 0.006598          |
| <b>South America</b> | 0.99725              | 0.001883                  | 0.97518    | 0.012991          |
